# Supplementary material for: B-site doping effects of NdBa0.75Ca0.25Co2O5+δ double perovskite catalysts for oxygen evolution and reduction reactions
Source: Royal Society of Chemistry journal article supplement (doi:10.1039/c8ta06236f), 2018-01-01
Supplement: c8ta06236f1.pdf [file c8ta06236f1.pdf]

## B-site doping effects of $\text{NdBa}_{0.75}\text{Ca}_{0.25}\text{Co}_2\text{O}_{5+\delta}$ double perovskite catalysts for oxygen evolution and reduction reactions

Nam-In Kim <sup>a,†</sup>, Sung-Hwa Cho <sup>a,†</sup>, Se Hwan Park <sup>b</sup>, Young Joo Lee <sup>b</sup>, Rana Arslan Afzal <sup>a</sup>, Jeseung Yoo <sup>a</sup>, Young-Soo Seo <sup>a</sup>, Yun Jung Lee <sup>b, \*\*</sup>, Jun-Young Park <sup>a, \*</sup>

### Supplementary Figures

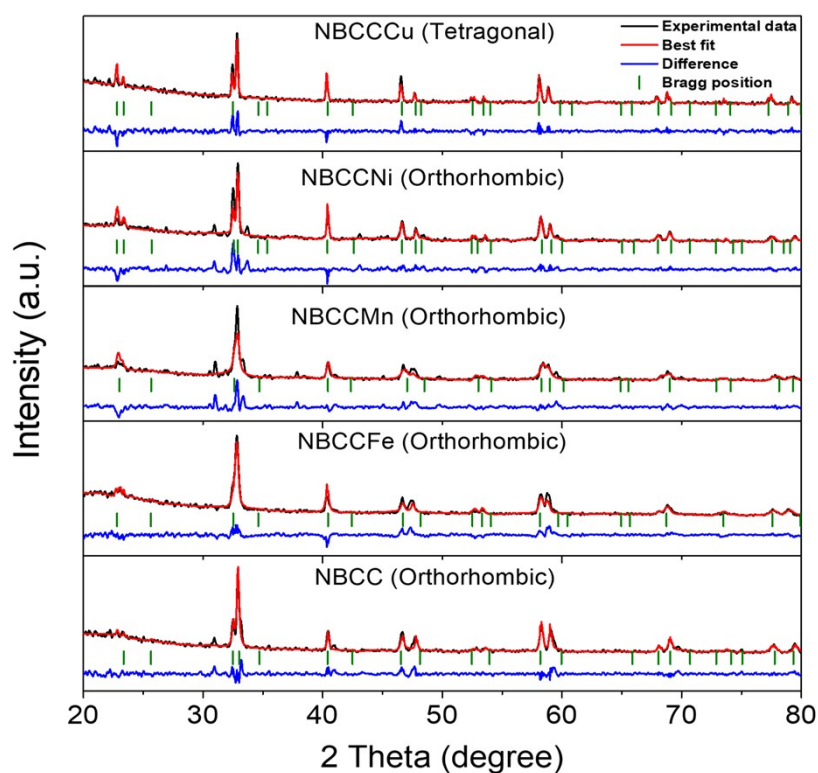

Fig. S1. Rietveld refinements of NBCC-based catalysts processed by the Fullprof program.

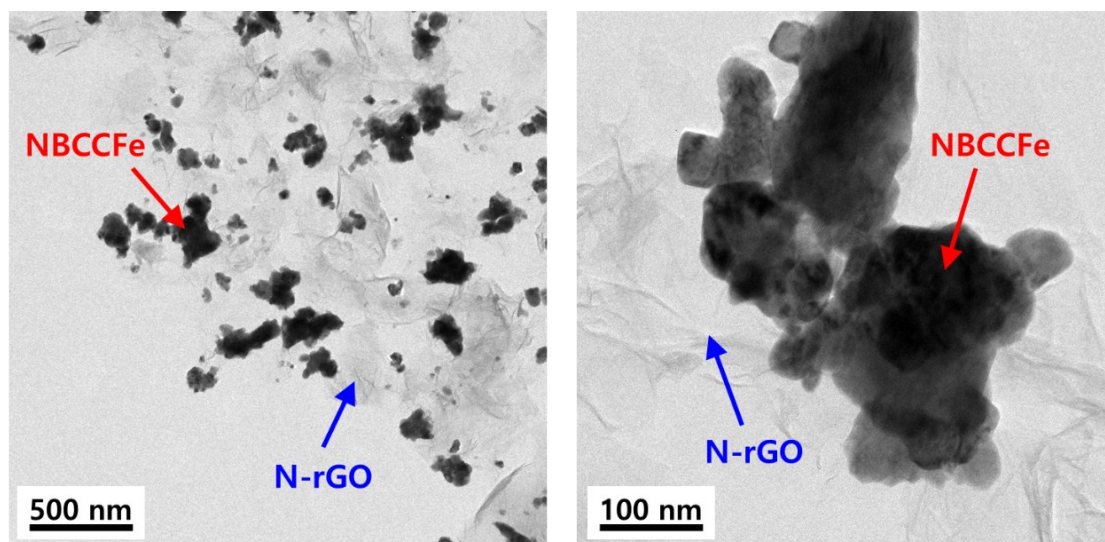

Fig. S2. Morphological characteristics of NBCCFe/N-rGO hybrid catalyst analyzed by HRTEM.

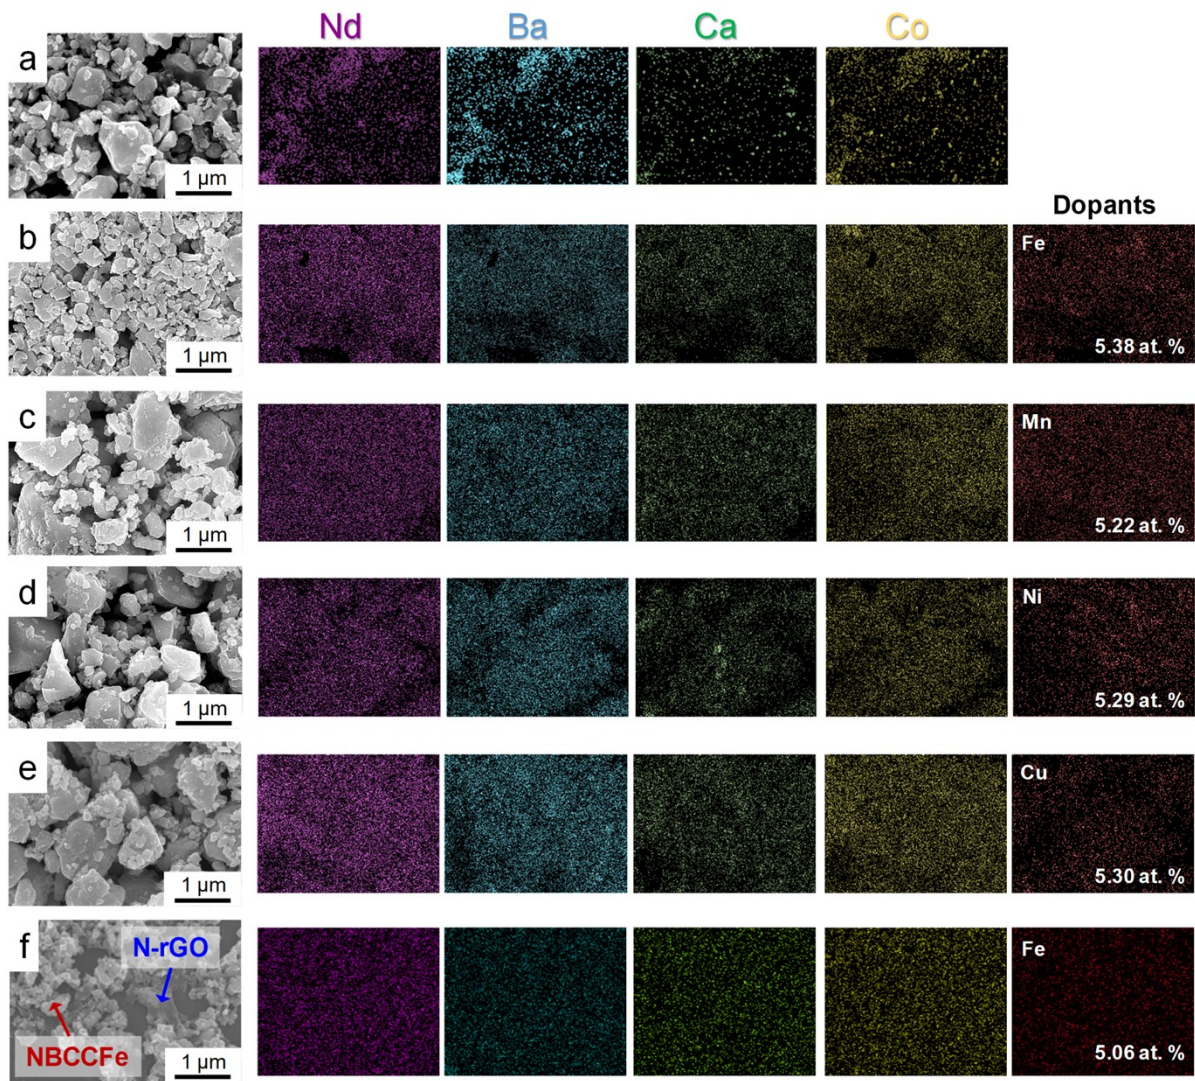

Fig. S3. Surface morphology and distribution of elemental compositions of catalysts by FE-SEM and EDX mapping: (a) NBCC (b) NBCCFe (c) NBCCMn (d) NBCCNi, (e) NBCCCu, and (f) NBCCFe/N-rGO.

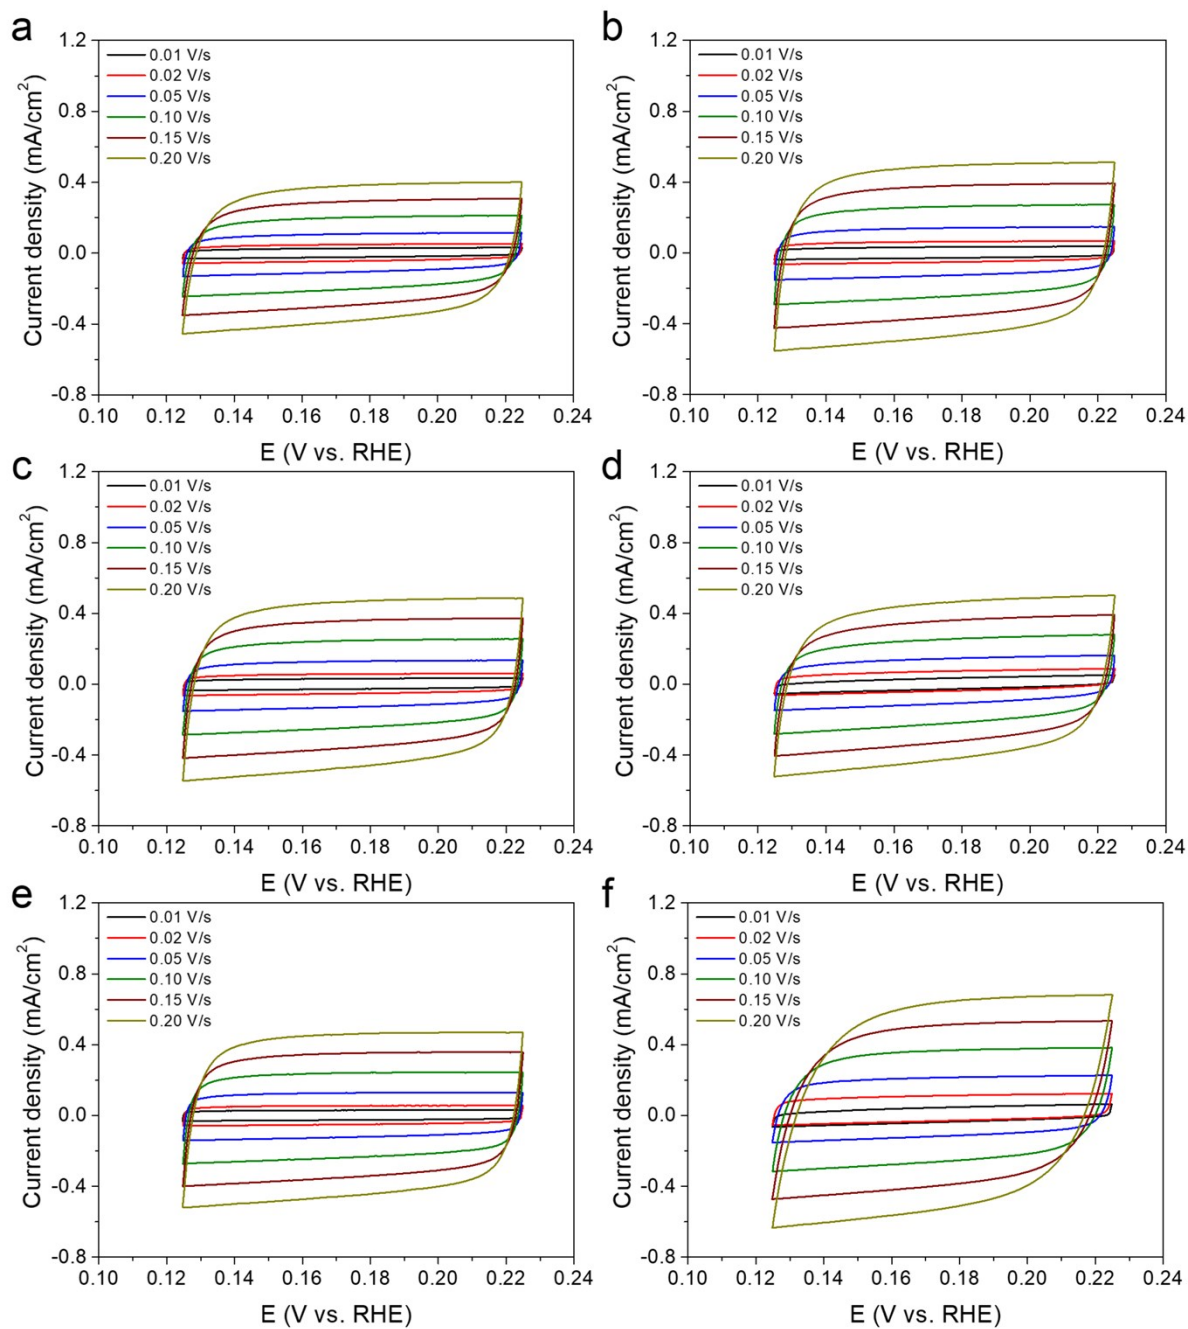

Fig. S4. Cyclic voltammogram curves of the catalysts with different scan rates (10-200  $\text{mV}\cdot\text{s}^{-1}$ ). (a) NBCC, (b) NBCCFe, (c) NBCCMn, (d) NBCCNi, (e) NBCCCu, and (f) NBCCFe/N-rGO.

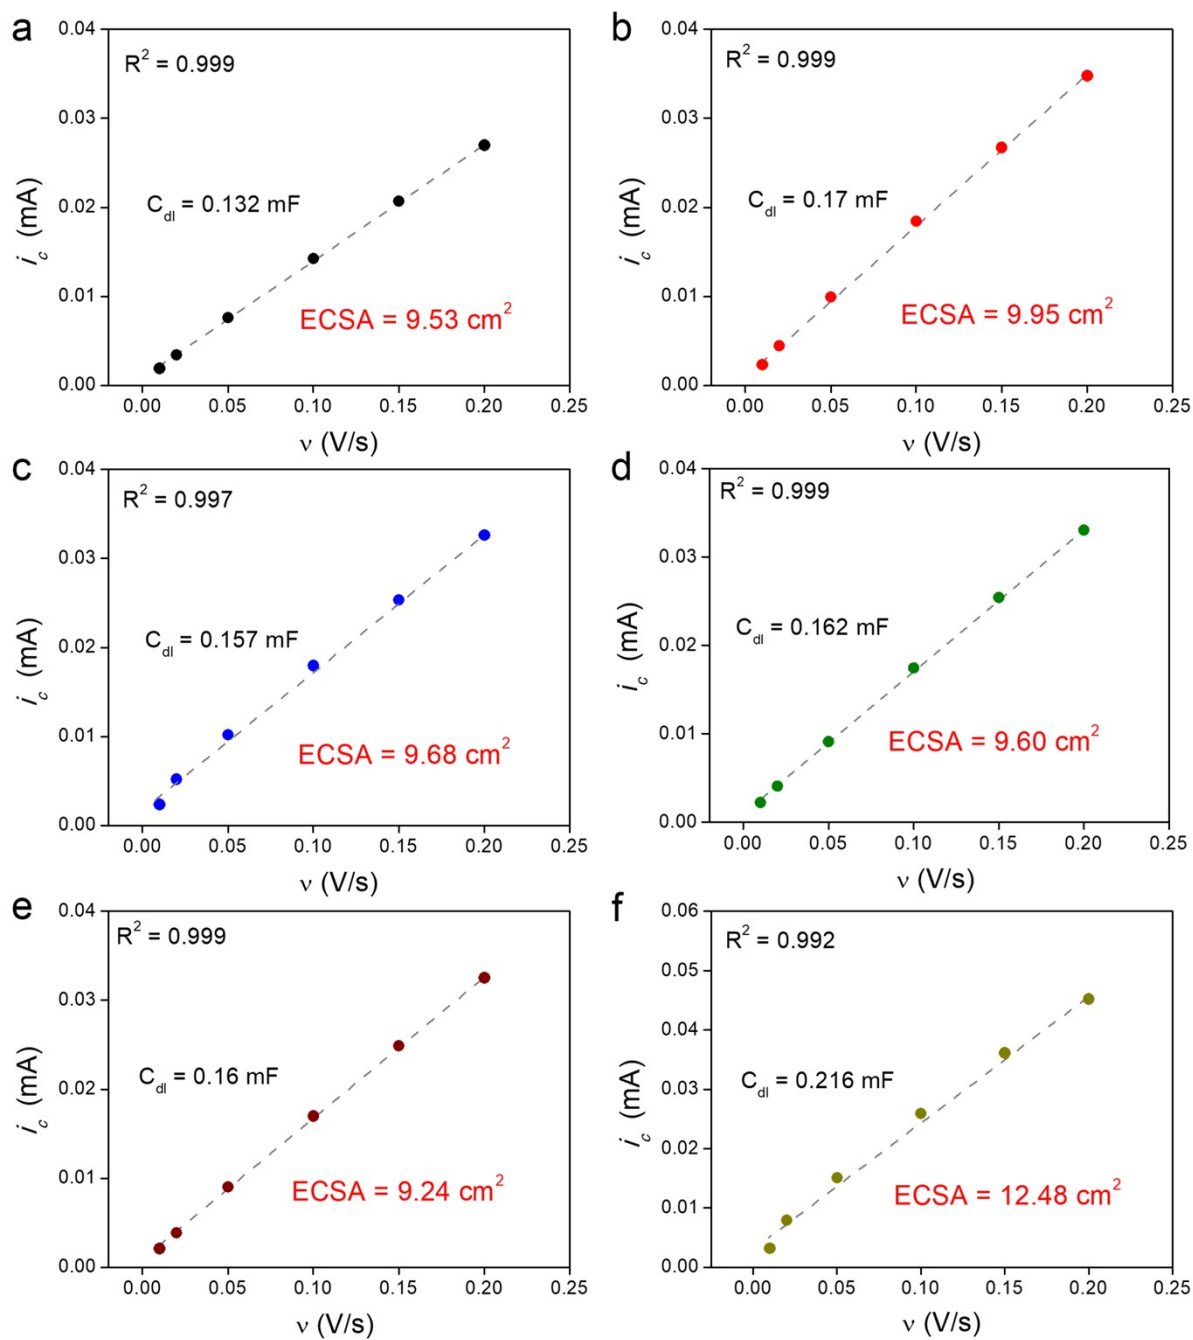

Fig. S5. Linear plots for the measured charging current ( $i_c$ ) versus scan rate for calculation of the ECSA. (a) NBCC, (b) NBCCFe, (c) NBCCMn, (d) NBCCNi, (e) NBCCCu, and (f) NBCCFe/N-rGO. Double layer capacitances of the materials were determined from the linear plots.

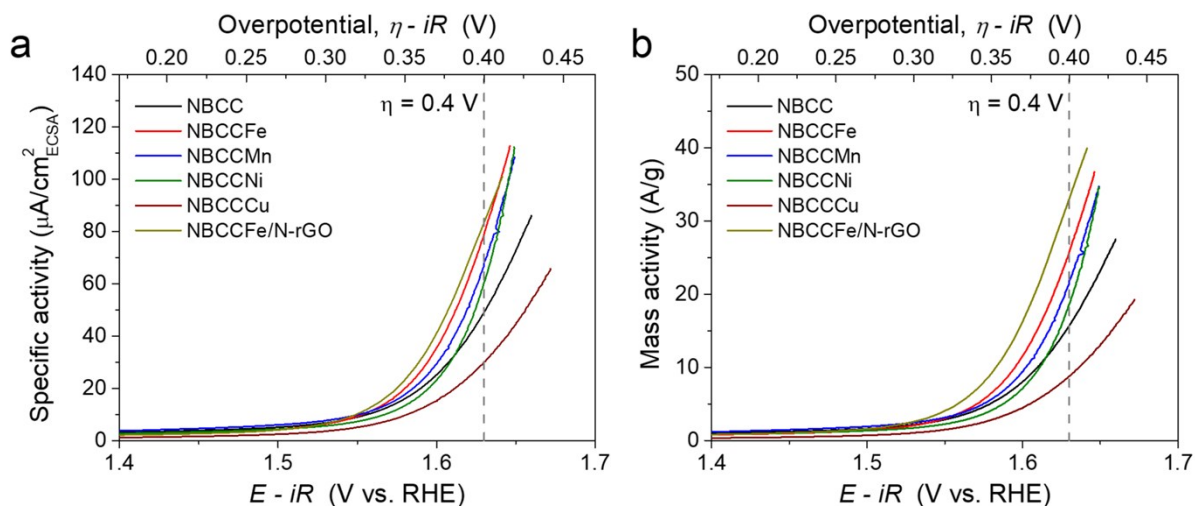

Fig. S6. (a) Specific activity ( $\mu\text{A}\cdot\text{cm}^{-2}_{\text{ECSA}}$ ) and (b) mass activity ( $\text{A}\cdot\text{g}^{-1}$ ) of catalysts in OER polarization curves normalized by the ECSA at  $\eta = 0.4\text{ V}$  in  $0.1\text{ M KOH}$  solution.

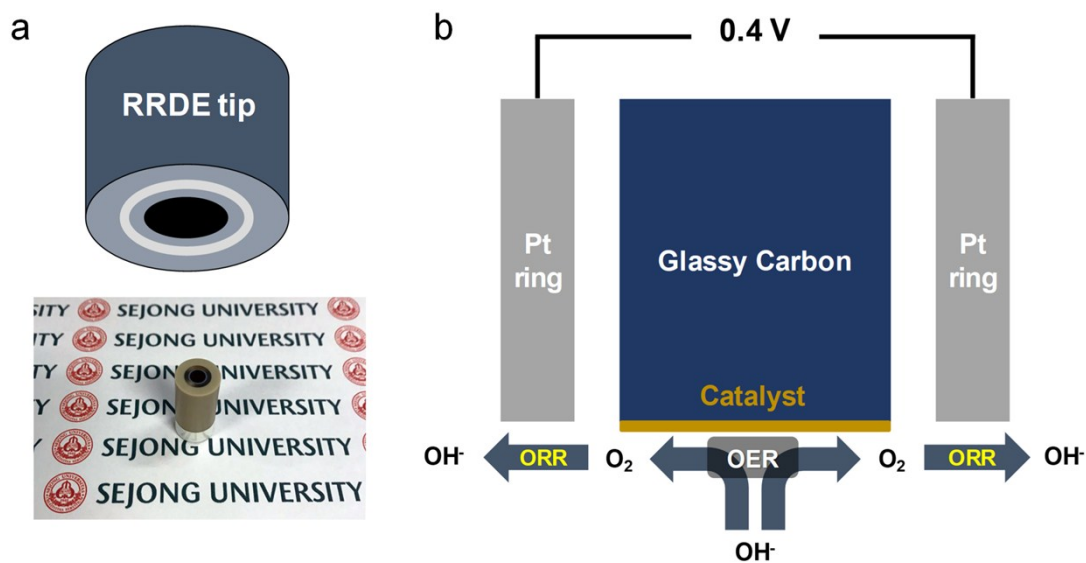

Fig. S7. (a) Schematic illustration (top) and Actual photograph (bottom) of the RRDE tip. (b) The continuous OER (disk) to ORR (ring) process initiated on a RRDE ( $\text{N}_2$ -saturated  $0.1\text{ M KOH}$ , ring potential:  $0.40\text{ V}$ ).

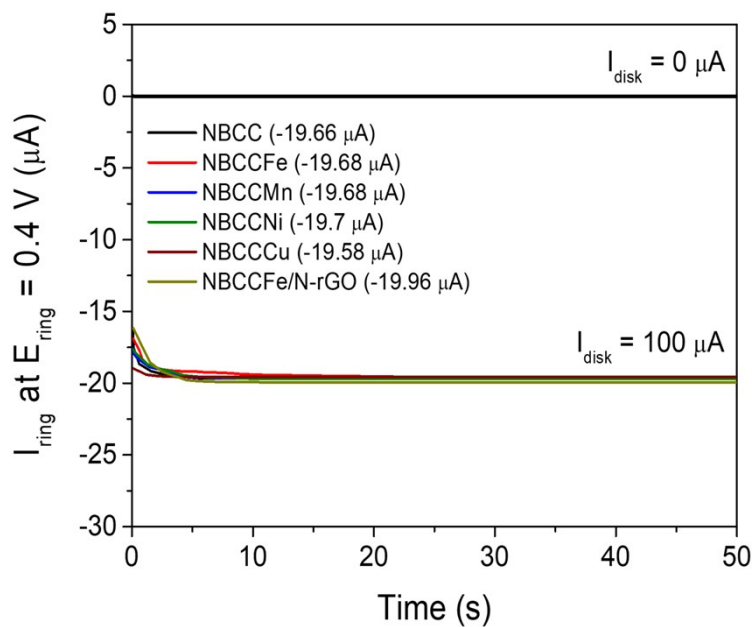

Fig. S8. The ring currents of NBCC-based catalysts on a RRDE (1,600 rpm) in 0.1 M KOH solution (ring potential: 0.40 V).

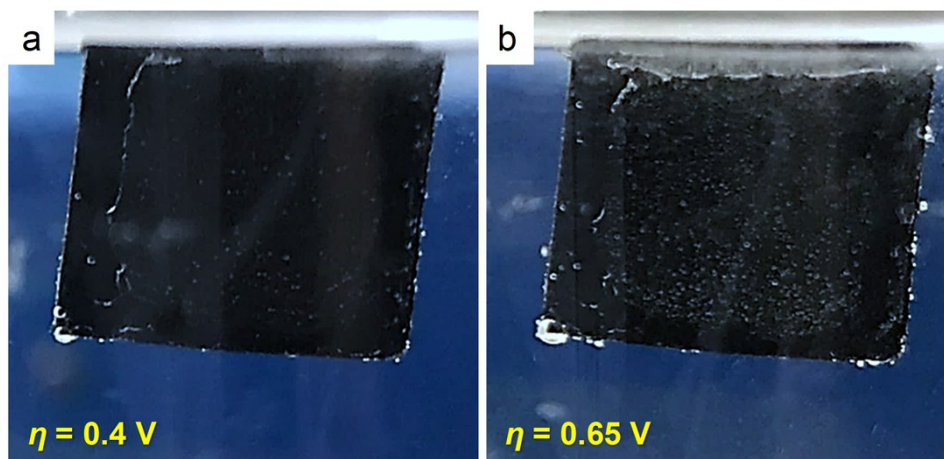

Fig. S9. Images of oxygen bubble generation in a large-scale water electrolysis half-cell (1 cm<sup>2</sup>) using the NBCCFe catalyst at  $\eta = 0.4$  V (left) and  $\eta = 0.65$  V (right).

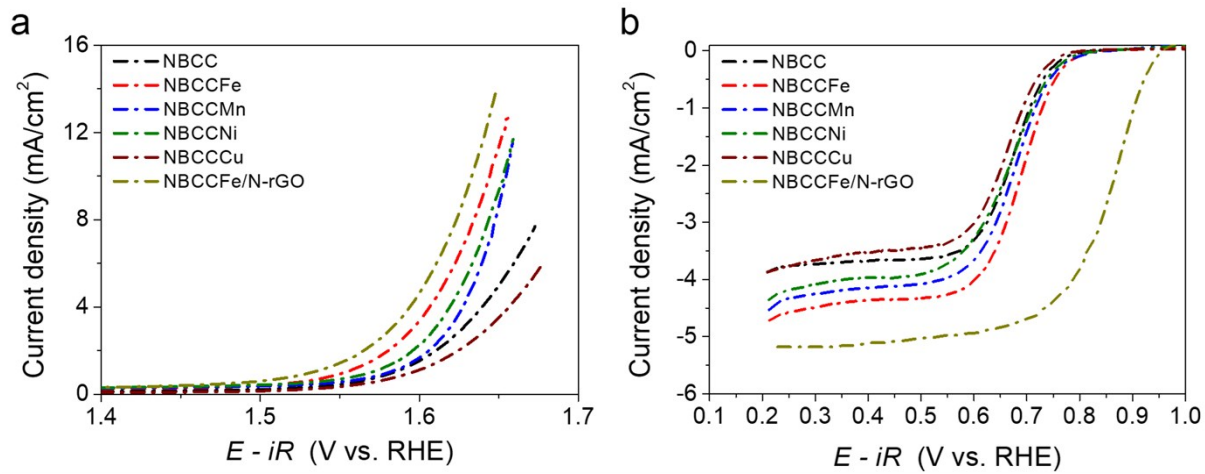

Fig. S10. 1,500<sup>th</sup> OER polarization curves and 10,000<sup>th</sup> ORR polarization curves of NBCC and doped-NBCC catalysts.



## 2. Supplementary Tables

Table S1. Comparison of oxygen activity of NBCCFe and NBCCFe/N-rGO with reported perovskite-based electrocatalysts.

| Catalysts                                                                                                                                          | $E_{\text{ORR}}$<br>(V)<br>at $j = -3$<br>$\text{mA cm}^{-2}$ | $E_{\text{OER}}$<br>(V)<br>at $j = 10$<br>$\text{mA cm}^{-2}$ | Oxygen<br>activity <sup>a</sup><br>(V) | Reference                                          |
|----------------------------------------------------------------------------------------------------------------------------------------------------|---------------------------------------------------------------|---------------------------------------------------------------|----------------------------------------|----------------------------------------------------|
| NBCCFe/N-rGO                                                                                                                                       | 0.848                                                         | 1.609                                                         | 0.761                                  | This Work                                          |
| NBCCFe                                                                                                                                             | 0.679                                                         | 1.627                                                         | 0.948                                  | This Work                                          |
| Core-Corona LaNiO <sub>3</sub> /N-CNT                                                                                                              | 0.64                                                          | 1.67                                                          | 1.03                                   | Nano Lett. 2012, 12, 1946 (Ref. 1)                 |
| La <sub>0.3</sub> (Ba <sub>0.5</sub> Sr <sub>0.5</sub> ) <sub>0.7</sub> Co <sub>0.8</sub> Fe <sub>0.2</sub> O <sub>3-<math>\delta</math></sub> /KB | 0.58                                                          | 1.59                                                          | 1.01                                   | Angew. Chem. Int. Ed. 2014, 53, 4582 (Ref. 2).     |
| porous CaMnO <sub>3</sub>                                                                                                                          | 0.8                                                           | 1.81                                                          | 1.01                                   | Adv. Mater. 2014, 26, 2047 (Ref. 3).               |
| Ar treated Ba <sub>0.5</sub> Sr <sub>0.5</sub> Co <sub>0.8</sub> Fe <sub>0.2</sub> O <sub>3</sub> /KB                                              | 0.62                                                          | 1.77                                                          | 1.05                                   | Adv. Energy Mater. 2015, 5, 1501560 (Ref. 4)       |
| LaTi <sub>0.65</sub> Fe <sub>0.35</sub> O <sub>3-<math>\delta</math></sub> /N-CNR                                                                  | 0.72                                                          | 1.77                                                          | 1.05                                   | Nano Energy 2015, 15, 92 (Ref. 5).                 |
| La <sub>0.5</sub> Sr <sub>0.5</sub> Co <sub>0.8</sub> Fe <sub>0.2</sub> O <sub>3</sub> -PR/N-rGO                                                   | 0.81                                                          | 1.73                                                          | 0.92                                   | Nano Energy 2014, 10, 192 (Ref. 6).                |
| La <sub>0.58</sub> Sr <sub>0.4</sub> Fe <sub>0.2</sub> Co <sub>0.8</sub> O <sub>3</sub> /N-CNT                                                     | 0.7                                                           | 1.63                                                          | 0.93                                   | Electrochimica Acta 2016, 208, 25 (Ref. 7).        |
| Multi-shelled La <sub>0.9</sub> Sr <sub>0.1</sub> CoO <sub>3</sub>                                                                                 | 0.64                                                          | 1.76                                                          | 1.12                                   | J. Mater. Chem. A, 2015, 3, 22448 (Ref. 8).        |
| NdBa <sub>0.5</sub> Sr <sub>0.5</sub> Co <sub>1.5</sub> Fe <sub>0.5</sub> O <sub>5+<math>\delta</math></sub> /CB                                   | 0.651                                                         | 1.624                                                         | 0.973                                  | J. Mater. Chem. A, 2017, 5, 13019 (Ref. 9).        |
| PrBa <sub>0.25</sub> Sr <sub>0.75</sub> Co <sub>2</sub> O <sub>5+<math>\delta</math></sub> /AB                                                     | 0.68                                                          | 1.65                                                          | 0.97                                   | Journal of Power Sources 2016, 334, 86 ((Ref. 10). |
| Mn-oxide film                                                                                                                                      | 0.73                                                          | 1.77                                                          | 1.04                                   | J. Am. Chem. Soc. 2010, 132, 13612 (Ref. 11).      |
| Co <sub>3</sub> O <sub>4</sub> /N,S-doped carbon                                                                                                   | 0.82                                                          | 1.61                                                          | 0.79                                   | Adv. Funct. Mater. 2014, 24, 7655 (Ref. 12).       |

|                                                |      |      |      |                                                 |
|------------------------------------------------|------|------|------|-------------------------------------------------|
| MnO <sub>x</sub> on stainless steel mesh       | 0.82 | 1.62 | 0.8  | Energy Environ. Sci. 2014, 7, 2017 (Ref. 13).   |
| Mn <sub>x</sub> O <sub>y</sub> /N-doped Carbon | 1.68 | 0.81 | 0.87 | Angew. Chem. Int. Ed. 2014, 53, 8508 (Ref. 14). |
| CNT@NCNT                                       | 0.65 | 1.73 | 1.08 | Adv. Funct. Mater. 2014, 24, 5956 (Ref. 15)     |
| N-doped graphene/CNT                           | 0.64 | 1.65 | 0.96 | Small 2014, 10, 2251 (Ref. 16).                 |
| N,S,Fe-doped Carbon                            | 0.87 | 1.78 | 0.91 | J. Am. Chem. Soc. 2014, 136, 14486 (Ref. 17).   |
| N-doped Carbon                                 | 0.77 | 1.61 | 0.84 | Nat. Commun. 2013, 4, 2390 (Ref. 18).           |

## References

1. Z. Chen, A. Yu, D. Higgins, H. Li, H. Wang, Z. Chen, Highly Active and Durable Core–Corona Structured Bifunctional Catalyst for Rechargeable Metal–Air Battery Application, *Nano Lett.* 12 (2012) 1946-1952.
2. J.-I Jung, H.Y. Jeong, J.-S. Lee, M.G. Kim, J. Cho, A Bifunctional Perovskite Catalyst for Oxygen Reduction and Evolution, *Angew. Chem. Int. Ed.* 53 (2014) 4582-4586.
3. X. Han, F. Cheng, T. Zhang, J. Yang, Y. Hu, J. Chen, Hydrogenated Uniform Pt Clusters Supported on Porous CaMnO<sub>3</sub> as a Bifunctional Electrocatalyst for Enhanced Oxygen Reduction and Evolution, *Adv. Mater.* 26 (2014) 2047-2051.
4. J.-I. Jung, S. Park, M-G. Kim, J. Cho, Tunable Internal and Surface Structures of the Bifunctional Oxygen Perovskite Catalysts, *Adv. Energy Mater.* 5 (2015) 1501560.
5. M. Prabu, P. Ramakrishnan, P. Ganesan, A. Manthiram, S. Shanmugam, LaTi<sub>0.65</sub>Fe<sub>0.35</sub>O<sub>3-δ</sub> nanoparticle-decorated nitrogen-doped carbon nanorods as an advanced hierarchical air electrode for rechargeable metal-air batteries, *Nano Energy* 15 (2015) 92-103.

6. H.W. Park, D.U. Lee, P. Zamani, M.H. Seo, L.F. Nazar, Z. Chen, Electrospun porous nanorod perovskite oxide/nitrogen-doped graphene composite as a bi-functional catalyst for metal air batteries, *Nano Energy* 10 (2014) 192-200.
7. K. Elumeeva, J. Masa, J. Sierau, F. Tietz, M. Muhler, W. Schuhmann, Perovskite-based bifunctional electrocatalysts for oxygen evolution and oxygen reduction in alkaline electrolytes, *Electrochim. Acta* 208 (2016) 25-32.
8. S. Bie, Y. Zhu, J. Su, C. Jin, S. Liu, R. Yang, J. Wu, One-pot fabrication of yolk-shell structured  $\text{La}_{0.9}\text{Sr}_{0.1}\text{CoO}_3$  perovskite microspheres with enhanced catalytic activities for oxygen reduction and evolution reactions, *J. Mater. Chem. A* 3 (2015) 22448-22453.
9. N.-I. Kim, R.A. Afzal, S.R. Choi, S.W. Lee, D. Ahn, S. Bhattacharjee, S.-C. Lee, J.H. Kim, J.-Y. Park, Highly active and durable nitrogen doped-reduced graphene oxide/double perovskite bifunctional hybrid catalysts, *J. Mater. Chem. A* 5 (2017) 13019-13031.
10. Z. Wu, L.-P. Sun, T. Xia, L.-H. Huo, H. Zhao, A. Rougier, J.C. Grenier, Effect of Sr doping on the electrochemical properties of bi-functional oxygen electrode  $\text{PrBa}_{1-x}\text{Sr}_x\text{Co}_2\text{O}_{5+\delta}$ , *J. Power Sources* 334 (2016) 86-93.
11. Y. Gorlin, T.F. Jaramillo, A Bifunctional Nonprecious Metal Catalyst for Oxygen Reduction and Water Oxidation, *J. Am. Chem. Soc.* 132 (2010) 13612-13614.
12. C. Zhang, M. Antonietti, T.-P. Fellingner, Blood Ties:  $\text{Co}_3\text{O}_4$  Decorated Blood Derived Carbon as a Superior Bifunctional Electrocatalyst, *Adv. Funct. Mater.* 24 (2014) 7655-7665.
13. J.W.D. Ng, M. Tang, T.F. Jaramillo, A carbon-free, precious-metal-free, high-performance  $\text{O}_2$  electrode for regenerative fuel cells and metal-air batteries, *Energy Environ. Sci.* 7 (2014) 2017-2024.

14. J. Masa, W. Xia, I. Sinev, A. Zhao, Z. Sun, S. Grützke, P. Weide, M. Muhler, W. Schuhmann,  $Mn_xO_y/NC$  and  $Co_xO_y/NC$  Nanoparticles Embedded in a Nitrogen-Doped Carbon Matrix for High-Performance Bifunctional Oxygen Electrodes, *Angew. Chem. Int. Ed.* 53 (2014) 8508-8512.
15. G.-L. Tian, Q. Zhang, B. Zhang, Y.-G. Jin, J.-Q. Huang, D.S. Su, Toward Full Exposure of “Active Sites”: Nanocarbon Electrocatalyst with Surface Enriched Nitrogen for Superior Oxygen Reduction and Evolution Reactivity, *Adv. Funct. Mater.* 24 (2014) 5956-5961.
16. G.-L. Tian, M.-Q. Zhao, D. Yu, X.-Y. Kong, J.-Q. Q. Zhang, F. Wei, Nitrogen-Doped Graphene/Carbon Nanotube Hybrids: In Situ Formation on Bifunctional Catalysts and Their Superior Electrocatalytic Activity for Oxygen Evolution/Reduction Reaction, *small* 10 (2014) 2251-2259.
17. N.R. Ashraie, J.P. Paraknowitsch, C. Göbel, A. Thomas, P. Strasser, Noble-Metal-Free Electrocatalysts with Enhanced ORR Performance by Task-Specific Functionalization of Carbon using Ionic Liquid Precursor Systems, *J. Am. Chem. Soc.* 136 (2014) 14486-14497.
18. Y. Zhao, R. Nakamura, K. Kamiya, S. Nakanishi, K. Hashimoto, Nitrogen-doped carbon nanomaterials as non-metal electrocatalysts for water oxidation, *Nat. Commun.*, 4 (2013) 2390.
